# Supplementary material for: Removal and growth of microorganisms across treatment and simulated distribution at a pilot-scale direct potable reuse facility
Source: Royal Society of Chemistry journal article supplement (doi:10.1039/c9ew01087d), 2020-01-01
Supplement: c9ew01087d1.pdf [file c9ew01087d1.pdf]

1     **Removal and Growth of Microorganisms across Treatment and Simulated Distribution at**  
2                                   **a Pilot-Scale Direct Potable Reuse Facility**

3  
4     **Scott E. Miller<sup>1,2</sup>, Roberto A. Rodriguez<sup>3</sup>, and Kara L. Nelson<sup>1,2,\*</sup>**

5  
6     <sup>1</sup>Department of Civil and Environmental Engineering, College of Engineering, University of  
7     California, Berkeley, CA, United States;

8     <sup>2</sup>National Science Foundation Engineering Research Center for Re-inventing the Nation's Urban  
9     Water Infrastructure, Berkeley, CA, United States;

10    <sup>3</sup>School of Public Health, University of Texas Health Sciences Center at Houston, TX, United  
11    States

12  
13    Corresponding author email: karanelson@berkeley.edu

14  
15    **Key words:** advanced water treatment, log removal values, flow cytometry, ATP, assimilable  
16    organic carbon, chlorine residual

17

18    **Table of Contents**

19    **1. SUPPLEMENTARY METHODS.....2**

20        1.1. CONVENTIONAL WASTEWATER TREATMENT PLANT .....2

21        1.2. OVERVIEW OF MAJOR TREATMENT PROCESSES OF THE PILOT TREATMENT FACILITY .....2

22        1.3. OZONE OPERATION .....2

23        1.4. MICROFILTRATION AND ULTRAFILTRATION OPERATION .....3

24        1.5. REVERSE OSMOSIS AND NANOFILTRATION OPERATION .....3

25        1.6. UV / ADVANCED OXIDATION PROCESS OPERATION .....3

26        1.7. GRANULAR ACTIVATED CARBON FILTER OPERATION .....3

27    **2. SUPPLEMENTARY TABLES .....5**

28    **3. SUPPLEMENTARY FIGURES .....10**

29    **4. REFERENCES .....13**

30

31

32

33

34 **1. Supplementary Methods**

35

36 **1.1. Conventional wastewater treatment plant**

37 The Roberto R. Bustamante Wastewater Treatment Plant supplied unchlorinated secondary  
38 wastewater effluent to the pilot advanced treatment train. The Bustamante plant is a conventional  
39 activated sludge facility with primary clarifiers, aeration basins designed for full nitrification of  
40 ammonia, and secondary clarifiers. It should be noted that despite its design, the facility often fails  
41 to fully nitrify ammonia during high loading periods.

42

43 **1.2. Overview of major treatment processes of the pilot treatment facility**

44 Unchlorinated secondary wastewater effluent was treated sequentially by the following processes  
45 (detailed information on each process is provided in later sections):

46

47 (1) **ozonation**, with a fixed target ozone concentration of 3.5 mg/L, ~5 min of storage time,  
48 and no detectable effluent residual. Ozonation was operated from October 26, 2015 –  
49 January 9, 2016 to evaluate potential benefits to MF/UF operation (e.g., lower biofouling  
50 and longer run-times between membrane backwashing);

51 (2) **chloramination**, with a target concentration of 2 – 4 mg/L as Cl<sub>2</sub>, added to reduce  
52 biofouling of downstream membranes;

53 (3) **parallel microfiltration (MF)** and **ultrafiltration (UF)** membranes, with nominal pore  
54 sizes of 0.1 μm and 0.04 μm, respectively;

55 (4) **parallel** membrane desalination units: one tightly-bound **nanofiltration (NF)**; (Dow, model  
56 NF90-400/34i) and one **reverse osmosis (RO)**; (Hydranautics, model ESPA-LD), both  
57 operated at an overall permeate recovery of ~80% and each composed of 12 first-stage  
58 elements feeding 6 second-stage elements;

59 (5) an **UV-advanced oxidation process (AOP)** consisting of low-pressure UV light (Trojan  
60 UV Swift SC B08™) supplied at a dose of 840 mJ/cm<sup>2</sup> and H<sub>2</sub>O<sub>2</sub> dosed to a target  
61 concentration of 4 mg/L. The AOP operational setpoints were chosen to target a 1.2-log<sub>10</sub>  
62 reduction of N-nitrosodimethylamine by photolysis and a 0.5-log<sub>10</sub> reduction of 1,4-  
63 dioxane with advanced oxidation;

64 (6) three **parallel granular activated carbon (GAC)** filters for quenching residual H<sub>2</sub>O<sub>2</sub>,  
65 consisting of a different type of filter media and operated at empty bed contact times of  
66 five minutes (GAC 1 and GAC 2) or 15 minutes (GAC 3).

67

68 **1.3. Ozone operation**

69 Ozone was operated during the latter half of the pilot test study to investigate possible  
70 benefits of ozonation on operation of downstream membranes (e.g., lower biofouling and longer  
71 run times). The ozonation unit was operated from October 26, 2015 to January 9, 2016, except for  
72 the dates of November 24 – December 2, 2015. The ozone dose was set as 0.5 mg/L of O<sub>3</sub> per 1  
73 mg/L of total organic carbon in the secondary wastewater feed to the pilot, which was measured  
74 as ~6 – 8 mg/L. Therefore, the ozone setpoint was set to 3.5 mg/L and was fed at a constant rate.  
75 Ozone treatment occurred in a reaction tank (~1 min hydraulic retention time), and effluent water  
76 was sent to an ozone decay tank (~4.5 min hydraulic retention time) to ensure no ozone reached  
77 the microfiltration or ultrafiltration membranes.

78

79

80 **1.4. Microfiltration and ultrafiltration operation**

81

82 **Table S1:** Microfiltration and ultrafiltration operating and cleaning parameters

| Parameter                  | Microfiltration           | Ultrafiltration                |
|----------------------------|---------------------------|--------------------------------|
| Nominal Pore Size          | 0.01 um                   | 0.04 um                        |
| Recovery                   | 95.40%                    | ~94%                           |
| Backwash Interval          | ~22 min                   | 25 min                         |
| Maintenance Clean Interval | 48 hours                  | 36 hours                       |
| Integrity Test Interval    | 24 hours                  | 24 hours                       |
| <b>Maintenance Clean</b>   |                           |                                |
| Solution                   | 1,250 mg/L NaOCl          | 200 mg/L NaOCl                 |
| Target Residual            | 600 mg/L NaOCl            | NA                             |
| <b>Recovery Clean</b>      |                           |                                |
| Step 1 Solution            | 1% NaOH + 1,000 ppm NaOCl | ~1% citric acid + pH ~2 by HCl |
| Step 1 Duration            | ~2 hours                  | ~2 hours                       |
| Step 2 Solution            | 2% citric acid            | 500 ppm NaOCl                  |
| Step 2 Duration            | ~1 hour                   | ~2 hours                       |

83

84 **1.5. Reverse osmosis and nanofiltration operation**

85 The nanofiltration (NF; Dow, model NF90-400/34i) and reverse osmosis (RO; Hydranautics, model ESPA-LD) membranes were each configured with 12 first-stage elements that fed six second-stage elements. They were operated at a flux of ~12 gallons per square foot per day and an overall permeate recovery of ~80%.

86 To limit mineral scaling, sulfuric acid was added to the RO and NF feed waters to a pH setpoint of 6.5 before November 12 (“Phase 1”) and a pH of 6.1 after November 12 (“Phase 2”). Over the course of Phase 1 the salt passage in the RO increased, indicating damage to the membranes attributable to formation of excessive scale. The second-stage RO elements were replaced on November 11, 2015, which restored salt rejection efficacy before the start of Phase 2.

87

88 **1.6. UV / advanced oxidation process operation**

89 The H<sub>2</sub>O<sub>2</sub>-based UV-advanced oxidation process (AOP) was designed to reduce 1.2 log<sub>10</sub> of NDMA by photolysis and 0.5 log<sub>10</sub> of dioxane by advanced oxidation. As part of the pilot testing, the AOP was fed RO permeate between 9/25/15 – 11/18/15 and NF permeate between 11/19/15 – 1/22/16. Arcadis engineers observed no noticeable impact on AOP performance between using RO or NF permeates as feed.

90

91 **1.7. Granular activated carbon filter operation**

92 Three granular activated carbon (GAC) filters were established one week before full operation of the advanced treatment facility. The filter media was catalytic re-agglomerated bituminous GAC (column 1; Calgon Centaur(R) HSL 8x30), catalytic coconut-shell derived GAC (column 2; Evoqua AquaCarb(R) 830), and re-agglomerated bituminous GAC (column 3; Calgon Filtrasorb(R) 300), respectively. Columns 1 and 2 were manufactured with proprietary “catalytic” properties that purportedly increase rates of reaction with oxidants like hydrogen peroxide by

93

109 increasing the number of sites available for catalysis. GAC filters were constructed identically  
110 (except for media type) at the pilot site in unsterile conditions. GAC media was installed as six-  
111 foot deep media beds loaded into 4-inch diameter clear PVC pipes that were exposed to ambient  
112 light.

113 Columns 1 and 2 were operated in catalytic mode at 0.8 gpm, corresponding to a surface  
114 loading rate of 9.2 gpm per square foot and an empty bed contact time of 5 minutes. Column 3  
115 was operated in adsorption mode at a flow rate of 0.25 gpm, corresponding to a surface loading  
116 rate of 2.9 gpm per square foot and an empty bed contact time of 15 minutes. Column 3 was  
117 operated in adsorption mode to assess potential benefits of additional total organic carbon removal.  
118 The filter columns were backwashed with stored GAC filtrate approximately every 2 – 4 weeks  
119 after appreciable increases in head loss.

120

121

122 **2. Supplementary Tables**

123

124 **Table S2:** Summary statistics for the standard error of the mean (i.e., precision of) for primary  
 125 measurements for cell counts, ATP, and assimilable organic carbon assays. Sample count (n) is  
 126 the number of triplicate measurements taken for each assay across the entire study period.

|                                                                                            | WW<br>2ndary | Ozone | Chloro-<br>mine | MF/UF | MF/UF<br>Storage<br>Tank | NF/RO | NF/RO<br>Storage | AOP | GAC | Reservoir | SDS | Full<br>Scale<br>DWDS |
|--------------------------------------------------------------------------------------------|--------------|-------|-----------------|-------|--------------------------|-------|------------------|-----|-----|-----------|-----|-----------------------|
| <b>ASSIMILABLE ORGANIC CARBON – Standard Error of the Mean of Primary Measurements (%)</b> |              |       |                 |       |                          |       |                  |     |     |           |     |                       |
| <b>Average</b>                                                                             | 2            | 4     | 4               | 4     | 2                        | 17    | 44               | 28  | 14  | NA        | NA  | NA                    |
| <b>St. Dev.</b>                                                                            | 1            | 3     | 3               | 3     | 2                        | 18    | 33               | 30  | 16  | NA        | NA  | NA                    |
| <b>Median</b>                                                                              | 2            | 4     | 4               | 3     | 2                        | 13    | 43               | 28  | 5   | NA        | NA  | NA                    |
| <b>Sample<br/>Count (n)</b>                                                                | 10           | 5     | 6               | 18    | 7                        | 18    | 7                | 5   | 33  | 2         | 2   | 0                     |
| <b>TOTAL CELL COUNT – Standard Error of the Mean of Primary Measurements (%)</b>           |              |       |                 |       |                          |       |                  |     |     |           |     |                       |
| <b>Average</b>                                                                             | 2            | 3     | 4               | 23    | 5                        | 16    | 7                | 11  | 3   | 40        | 7   | 28                    |
| <b>St. Dev.</b>                                                                            | 1            | 3     | 4               | 26    | 4                        | 14    | 3                | 9   | 2   | 22        | 7   | 20                    |
| <b>Median</b>                                                                              | 1            | 2     | 3               | 11    | 4                        | 12    | 8                | 8   | 2   | 37        | 5   | 27                    |
| <b>Count</b>                                                                               | 12           | 12    | 12              | 24    | 12                       | 24    | 12               | 12  | 36  | 90        | 90  | 11                    |
| <b>INTACT CELL COUNT – Standard Error of the Mean of Primary Measurements (%)</b>          |              |       |                 |       |                          |       |                  |     |     |           |     |                       |
| <b>Average</b>                                                                             | 2            | 4     | 3               | 28    | 4                        | 19    | 15               | 13  | 3   | 66        | 13  | 38                    |
| <b>St. Dev.</b>                                                                            | 2            | 4     | 3               | 28    | 3                        | 13    | 18               | 7   | 2   | 36        | 16  | 40                    |
| <b>Median</b>                                                                              | 1            | 2     | 2               | 25    | 4                        | 17    | 6                | 14  | 3   | 77        | 7   | 18                    |
| <b>Count</b>                                                                               | 12           | 12    | 12              | 24    | 12                       | 24    | 12               | 12  | 36  | 90        | 90  | 11                    |
| <i>(repeated<br/>header for<br/>reference)</i>                                             | WW<br>2ndary | Ozone | Chloro-<br>mine | MF/UF | MF/UF<br>Storage<br>Tank | NF/RO | NF/RO<br>Storage | AOP | GAC | Reservoir | SDS | Full<br>Scale<br>DWDS |
| <b>TOTAL ATP – Standard Error of the Mean of Primary Measurements (%)</b>                  |              |       |                 |       |                          |       |                  |     |     |           |     |                       |
| <b>Average</b>                                                                             | 6            | 4     | 3               | 2     | 1                        | 2     | 1                | 5   | 3   | 5         | 2   | NA                    |
| <b>St. Dev.</b>                                                                            | 4            | 3     | 2               | 1     | 1                        | 2     | 1                | 3   | 4   | 3         | 2   | NA                    |
| <b>Median</b>                                                                              | 5            | 3     | 3               | 2     | 1                        | 1     | 1                | 4   | 2   | 4         | 1   | NA                    |
| <b>Count</b>                                                                               | 8            | 8     | 8               | 16    | 8                        | 16    | 8                | 8   | 24  | 15        | 48  | 0                     |
| <b>INTRACELLULAR ATP – Standard Error of the Mean of Primary Measurements (%)</b>          |              |       |                 |       |                          |       |                  |     |     |           |     |                       |
| <b>Average</b>                                                                             | 16           | 10    | 3               | 3     | 1                        | 2     | 2                | 5   | 3   | 4         | 2   | NA                    |
| <b>St. Dev.</b>                                                                            | 9            | 15    | 4               | 3     | 1                        | 2     | 2                | 4   | 2   | 2         | 1   | NA                    |
| <b>Median</b>                                                                              | 13           | 3     | 2               | 2     | 1                        | 1     | 1                | 5   | 2   | 4         | 1   | NA                    |
| <b>Count</b>                                                                               | 8            | 8     | 8               | 16    | 8                        | 16    | 8                | 8   | 24  | 15        | 48  | 0                     |

127 **Table S3:** Nutrient and mineral buffers added to samples in the AOC assay to create carbon-  
 128 limiting conditions, per protocol in Drinking Water Microbiology Group at Eawag, Switzerland  
 129 (Hammes, 2015).

| <b>(1) Phosphate-Nitrogen Buffer</b>      | Concentration (g/L) |
|-------------------------------------------|---------------------|
| Sodium phosphate dibasic                  | 1.28                |
| Potassium phosphate monobasic             | 0.3                 |
| Ammonium sulfate                          | 1.77                |
| <b>(2) Iron-Chloride Solution (10 mM)</b> |                     |
| Iron (III) chloride hexahydrate           | 2.7                 |
| <b>(3) Trace Element Solution</b>         |                     |
| Calcium carbonate                         | 8                   |
| Magnesium chloride                        | 1.15                |
| Copper sulfate                            | 0.15                |
| Cobalt chloride                           | 0.13                |
| Zinc oxide                                | 0.4                 |
| Boric acid                                | 0.12                |
| Magnesium chloride                        | 13.42               |
| Sodium molybdenum                         | 1.04                |

130  
 131 **Table S4: Determination of the lower limit of quantification of flow cytometric total and**  
 132 **intact cell counts.** All samples were 0.1 µm-filtered bottled mineral water (Evian, France) run  
 133 with 1,000 uL of volume on a BD Accuri™ C6 flow cytometer.

| Sample Blank w/o Fluorescent Dye |                  | Total Cell Counts Assay        |             | Intact Cell Counts Assay       |             |
|----------------------------------|------------------|--------------------------------|-------------|--------------------------------|-------------|
| Replicate #                      | Count [cells/mL] | Replicate #                    | cells/mL    | Replicate #                    | cells/mL    |
| 1                                | 0                | 1                              | 5           | 1                              | 6           |
| 2                                | 0                | 2                              | 2           | 2                              | 13          |
| 3                                | 0                | 3                              | 3           | 3                              | 6           |
| 4                                | 0                | 4                              | 3           | 4                              | 5           |
| 5                                | 0                | 5                              | 5           | 5                              | 10          |
| 6                                | 0                | 6                              | 2           | 6                              | 3           |
| 7                                |                  | 7                              | 9           | 7                              | 6           |
| 8                                |                  | 8                              | 1           | 8                              | 18          |
| 9                                |                  | 9                              | 3           | 9                              | 3           |
| 10                               |                  | 10                             | 8           | 10                             | 8           |
| 11                               |                  | 11                             | 1           | 11                             | 4           |
| Average                          | 0                | Average                        | 3.8         | Average                        | 7.5         |
| Standard Deviation               | 0.0              | Standard Deviation             | 2.6         | Standard Deviation             | 4.7         |
|                                  |                  | 3x Standard Deviation          | 7.9         | 3x Standard Deviation          | 14.1        |
|                                  |                  | <b>Limit of Quantification</b> | <b>11.7</b> | <b>Limit of Quantification</b> | <b>21.6</b> |

134  
 135  
 136

137 **Table S5: Summary statistics for total and intact cell count measurements across the pilot**  
 138 **treatment train.** For calculation of average and standard deviation, all samples with cell counts  
 139 below the limit of quantification (“LoQ”) were set to the LoQ.

| Grouped Sampling Location | Flow Cytometry Assay | Avg. (cells/mL) | St. Dev. (cells/mL) | Count (n) | Count (n) less than LoQ | % Less than LoQ |
|---------------------------|----------------------|-----------------|---------------------|-----------|-------------------------|-----------------|
| WW 2ndary                 | Total Cell Count     | 1.68E+07        | 1.93E+07            | 10        | 0                       | 0               |
| WW 2ndary                 | Intact Cell Count    | 1.30E+07        | 1.56E+07            | 10        | 0                       | 0               |
| Ozone                     | Total Cell Count     | 1.44E+07        | 1.92E+07            | 8         | 0                       | 0               |
| Ozone                     | Intact Cell Count    | 6.62E+06        | 1.24E+07            | 8         | 0                       | 0               |
| Chloramine                | Total Cell Count     | 1.23E+07        | 1.62E+07            | 10        | 0                       | 0               |
| Chloramine                | Intact Cell Count    | 5.11E+06        | 8.15E+06            | 10        | 0                       | 0               |
| MF/UF                     | Total Cell Count     | 6.91E+02        | 1.21E+03            | 17        | 0                       | 0               |
| MF/UF                     | Intact Cell Count    | 4.49E+02        | 9.61E+02            | 17        | 4                       | 24              |
| MF/UF Tank                | Total Cell Count     | 3.15E+03        | 1.82E+03            | 8         | 0                       | 0               |
| MF/UF Tank                | Intact Cell Count    | 2.31E+03        | 1.42E+03            | 8         | 0                       | 0               |
| NF/RO                     | Total Cell Count     | 7.40E+01        | 8.70E+01            | 24        | 0                       | 0               |
| NF/RO                     | Intact Cell Count    | 3.34E+01        | 2.69E+01            | 24        | 17                      | 71              |
| NF/RO Tank                | Total Cell Count     | 6.50E+02        | 9.57E+02            | 9         | 0                       | 0               |
| NF/RO Tank                | Intact Cell Count    | 3.74E+02        | 6.36E+02            | 9         | 4                       | 44              |
| AOP                       | Total Cell Count     | 4.66E+02        | 6.47E+02            | 7         | 0                       | 0               |
| AOP                       | Intact Cell Count    | 1.65E+02        | 1.96E+02            | 7         | 0                       | 0               |
| GAC                       | Total Cell Count     | 1.08E+04        | 4.62E+03            | 33        | 0                       | 0               |
| GAC                       | Intact Cell Count    | 7.88E+03        | 3.28E+03            | 33        | 0                       | 0               |
| Reservoir                 | Total Cell Count     | 5.35E+01        | 4.69E+01            | 30        | 1                       | 3               |
| Reservoir                 | Intact Cell Count    | 2.50E+01        | 8.73E+00            | 30        | 24                      | 80              |
| SDS                       | Total Cell Count     | 1.27E+04        | 2.07E+04            | 88        | 0                       | 0               |
| SDS                       | Intact Cell Count    | 3.70E+03        | 9.76E+03            | 88        | 2                       | 2               |

140  
 141  
 142

143 **Table S6: Summary statistics for total and intracellular ATP measurements across the pilot**  
 144 **treatment train.** For calculation of average and standard deviation, all samples with cell counts  
 145 below the limit of quantification (“LoQ”) were set to the LoQ.

| Grouped Sampling Location | ATP Assay         | Avg. (cells/mL) | St. Dev. (cells/mL) | Count (n) | Count (n) less than LoQ | % Less than LoQ |
|---------------------------|-------------------|-----------------|---------------------|-----------|-------------------------|-----------------|
| WW 2ndary                 | Total ATP         | 5.88E+00        | 2.69E+00            | 8         | 0                       | 0               |
| WW 2ndary                 | Intracellular ATP | 5.14E+00        | 2.51E+00            | 8         | 0                       | 0               |
| Ozone                     | Total ATP         | 3.83E+00        | 2.02E+00            | 8         | 0                       | 0               |
| Ozone                     | Intracellular ATP | 1.26E+00        | 8.71E-01            | 8         | 0                       | 0               |
| Chloramine                | Total ATP         | 4.19E+00        | 2.52E+00            | 8         | 0                       | 0               |
| Chloramine                | Intracellular ATP | 8.16E-01        | 6.94E-01            | 8         | 0                       | 0               |
| MF/UF                     | Total ATP         | 2.63E+00        | 1.35E+00            | 16        | 0                       | 0               |
| MF/UF                     | Intracellular ATP | 2.22E-01        | 3.69E-01            | 16        | 0                       | 0               |
| MF/UF Tank                | Total ATP         | 2.80E+00        | 1.38E+00            | 8         | 0                       | 0               |
| MF/UF Tank                | Intracellular ATP | 1.50E-01        | 1.02E-01            | 8         | 0                       | 0               |
| NF/RO                     | Total ATP         | 5.44E-03        | 5.17E-03            | 16        | 0                       | 0               |
| NF/RO                     | Intracellular ATP | 2.12E-04        | 2.55E-04            | 16        | 1                       | 6               |
| NF/RO Tank                | Total ATP         | 4.72E-03        | 2.29E-03            | 8         | 0                       | 0               |
| NF/RO Tank                | Intracellular ATP | 1.95E-04        | 1.59E-04            | 8         | 1                       | 13              |
| AOP                       | Total ATP         | 2.08E-04        | 8.20E-05            | 8         | 0                       | 0               |
| AOP                       | Intracellular ATP | 5.37E-05        | 6.75E-05            | 8         | 2                       | 25              |
| GAC                       | Total ATP         | 2.48E-03        | 1.18E-03            | 21        | 0                       | 0               |
| GAC                       | Intracellular ATP | 1.08E-03        | 9.22E-04            | 21        | 0                       | 0               |
| Reservoir                 | Total ATP         | 4.95E-04        | 1.91E-04            | 15        | 0                       | 0               |
| Reservoir                 | Intracellular ATP | -7.08E-05       | 2.25E-04            | 15        | 6                       | 40              |
| SDS                       | Total ATP         | 1.06E-02        | 1.45E-02            | 48        | 0                       | 0               |
| SDS                       | Intracellular ATP | 1.13E-03        | 1.51E-03            | 48        | 2                       | 4               |

146



147 **Table S7: AOC concentrations after major treatment processes in the pilot facility.** AOC  
 148 concentrations (in µg/L) averaged from all sampling dates are shown followed by standard  
 149 deviations from technical triplicate measurements in parentheses. Sample count (n) is shown to  
 150 the right of each data subset. Data for individual treatment processes and combined parallel  
 151 processes are shown on separate rows (e.g., “MF/UF”). Data on the right half of columns show  
 152 MF and UF data collected at 9 hours or more after a maintenance clean or recovery clean.

| Sample Location              | All Samples  |     |               |     |                |     | MF and UF Samples Collected<br>9+ hours After Cleaning |     |               |     |                |     |
|------------------------------|--------------|-----|---------------|-----|----------------|-----|--------------------------------------------------------|-----|---------------|-----|----------------|-----|
|                              | All<br>Days  | (n) | Ozone<br>"On" | (n) | Ozone<br>"Off" | (n) | All<br>Days                                            | (n) | Ozone<br>"On" | (n) | Ozone<br>"Off" | (n) |
| Secondary<br>Wastewater Feed | 335<br>(103) | 10  | 333 (79)      | 6   | 338<br>(146)   | 4   |                                                        |     |               |     |                |     |
| Ozone                        | 790<br>(500) | 6   | 790<br>(500)  | 6   | NA             | NA  |                                                        |     |               |     |                |     |
| Chloramine                   | 465<br>(299) | 6   | 943<br>(NA)   | 1   | 440<br>(213)   | 5   |                                                        |     |               |     |                |     |
| MF                           | 398<br>(207) | 8   | 414<br>(164)  | 4   | 380<br>(269)   | 4   | 303<br>(195)                                           | 6   | 443<br>(188)  | 3   | 162 (28)       | 3   |
| UF                           | 260<br>(157) | 10  | 258<br>(105)  | 5   | 260<br>(197)   | 5   | 203<br>(95)                                            | 6   | 232<br>(101)  | 4   | 146 (64)       | 2   |
| MF + UF<br>("MF/UF")         | 320<br>(185) | 18  | 327<br>(150)  | 9   | 312<br>(225)   | 9   | 253<br>(155)                                           | 12  | 323<br>(172)  | 7   | 156 (39)       | 5   |
| MF/UF Storage<br>Tank        | 345<br>(170) | 6   | 373<br>(0.35) | 2   | 330<br>(218)   | 4   |                                                        |     |               |     |                |     |
| RO                           | 0 (0)        | 8   | 0 (0)         | 3   | 0 (0)          | 5   |                                                        |     |               |     |                |     |
| NF                           | 0 (0)        | 8   | 0 (0)         | 3   | 0 (0)          | 5   |                                                        |     |               |     |                |     |
| NF + RO<br>("NF/RO")         | 0 (0)        | 16  | 0 (0)         | 7   | 0 (0)          | 9   |                                                        |     |               |     |                |     |
| NF/RO Storage<br>Tank        | 0 (0)        | 6   | 0 (0)         | 2   | 0 (0)          | 4   |                                                        |     |               |     |                |     |
| AOP                          | 0 (0)        | 6   | 0 (0)         | 2   | 0 (0)          | 4   |                                                        |     |               |     |                |     |
| GAC 1                        | 67<br>(55)   | 6   | 154<br>(NA)   | 1   | 50 (39)        | 5   |                                                        |     |               |     |                |     |
| GAC 2                        | 66<br>(35)   | 6   | 64 (NA)       | 1   | 67 (39)        | 5   |                                                        |     |               |     |                |     |
| GAC 3                        | 47<br>(26)   | 6   | 21 (NA)       | 1   | 52 (27)        | 5   |                                                        |     |               |     |                |     |

155 3. Supplementary Figures  
156

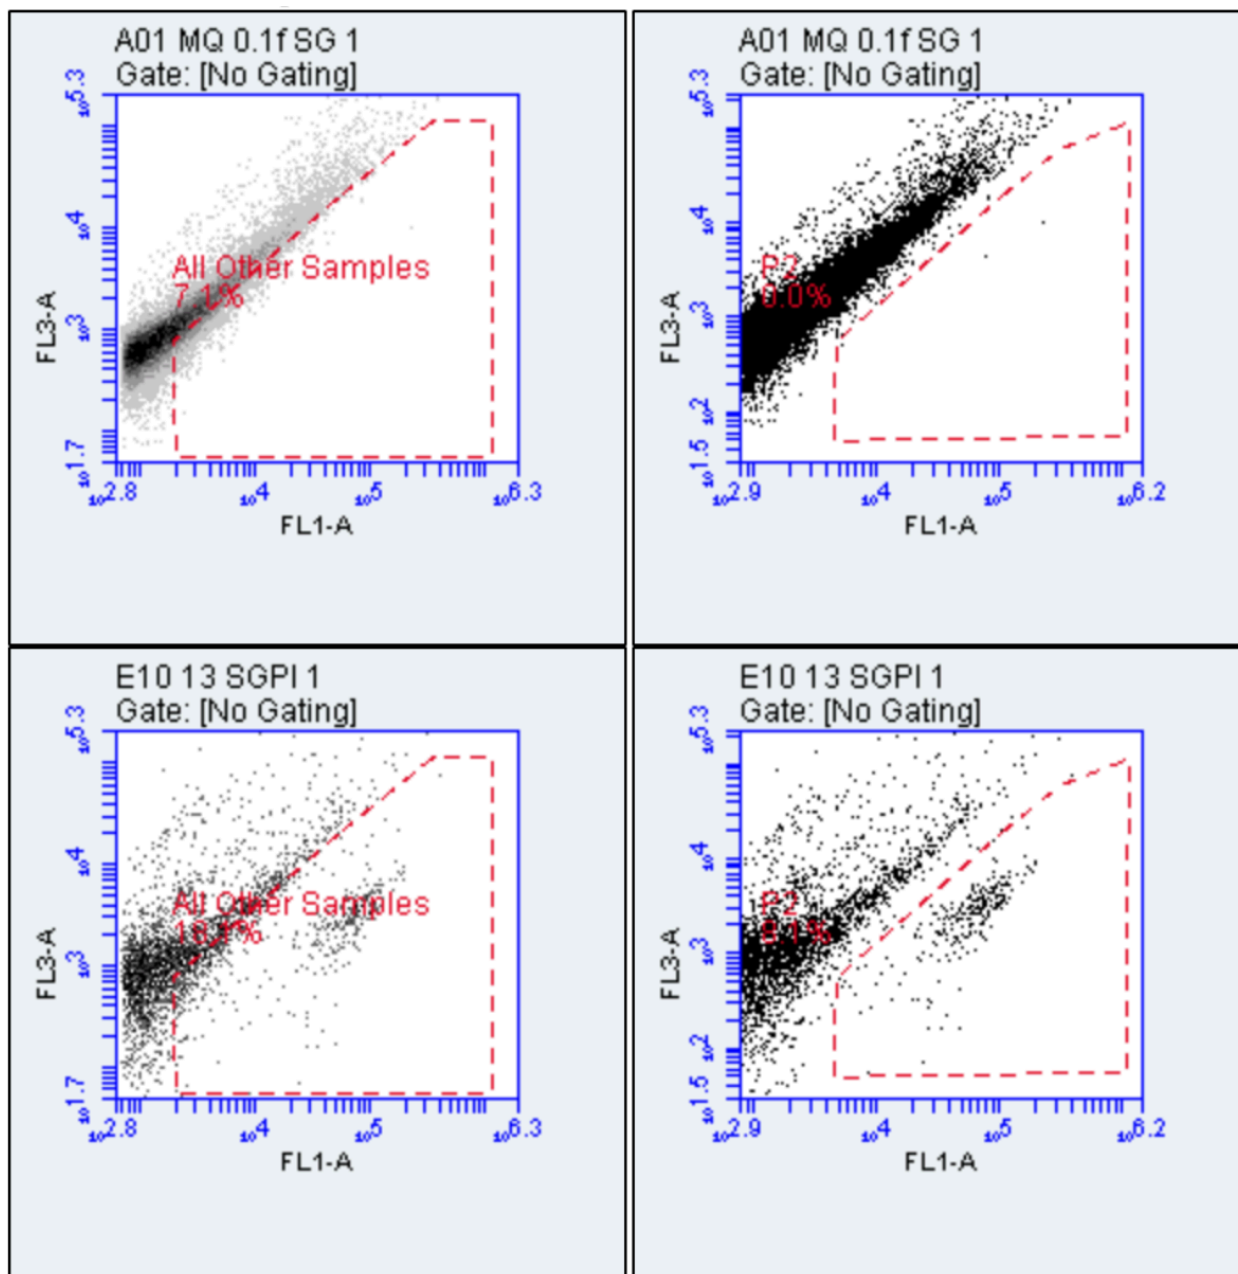

157  
158 **Figure S1: Adjusted gates for flow cytometry on the BD Accuri C6 for microfiltration,**  
159 **ultrafiltration, nanofiltration, reverse osmosis, and UV-advanced oxidation.** The top two and  
160 bottom two pictures show cell counts for 0.1  $\mu\text{m}$ -filtered nanopure water (“MQ 0.1f SG 1”) and  
161 reverse osmosis permeate (“13 SGPI 1”), respectively. The gate applied in the left-hand column is  
162 a publicly available gate developed by researchers at the Swiss Federal Institute of Aquatic Science  
163 and Technology (“Eawag, Switzerland) for aquatic samples analyzed on the BD Accuri™ C6 flow  
164 cytometer (Gatza, Hammes, & Prest, 2013), whereas the gate applied in the right-hand column is  
165 modified from the Eawag template to avoid excessive noise in low-cell count samples.  
166  
167

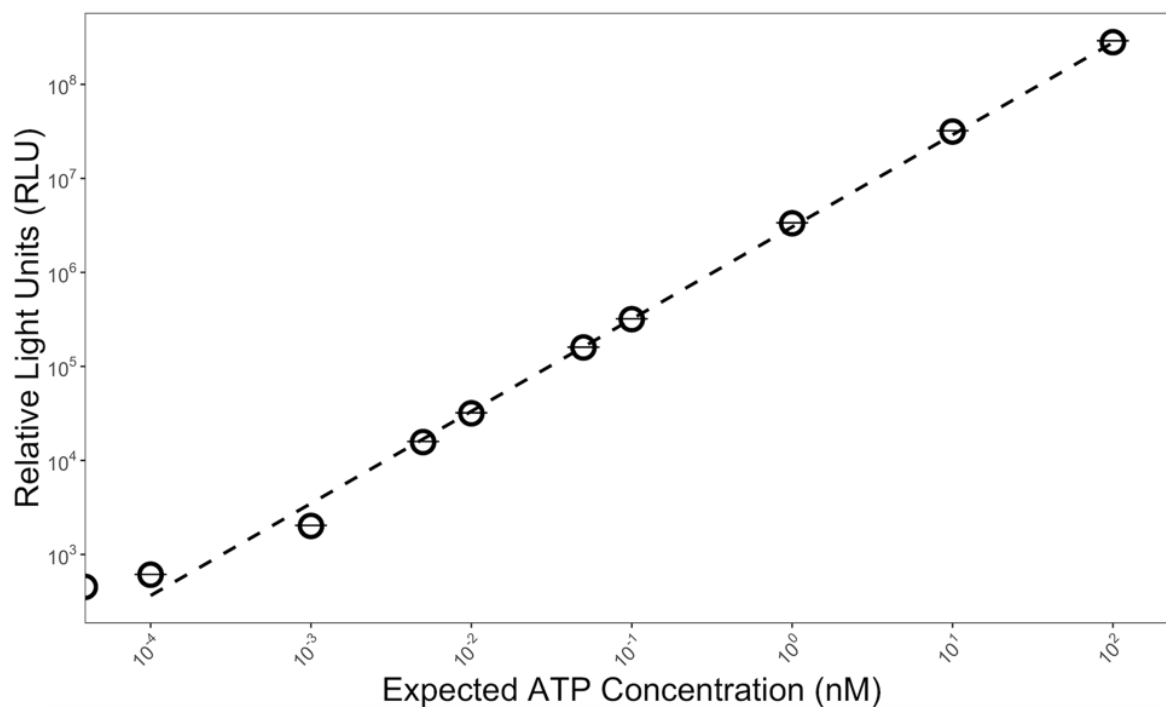

169  
 170 **Figure S2: Calibration curve for determining ATP concentrations.** This calibration curve was  
 171 created by diluting pure ATP standard diluted in 0.1- $\mu$ m filtered and autoclaved ultrapure water.  
 172 The curve was experimentally determined to be  $y = 2,808,903 * x + 410267$ , where “y” is  
 173 luminescence in RLU and “x” is ATP concentration in nM. Error bars show the standard deviation  
 174 of triplicate measurements. The curve was found to be linear between ATP concentrations of  $10^{-4}$   
 175 and  $10^2$  nM with an  $R^2$  of 0.9998.  
 176

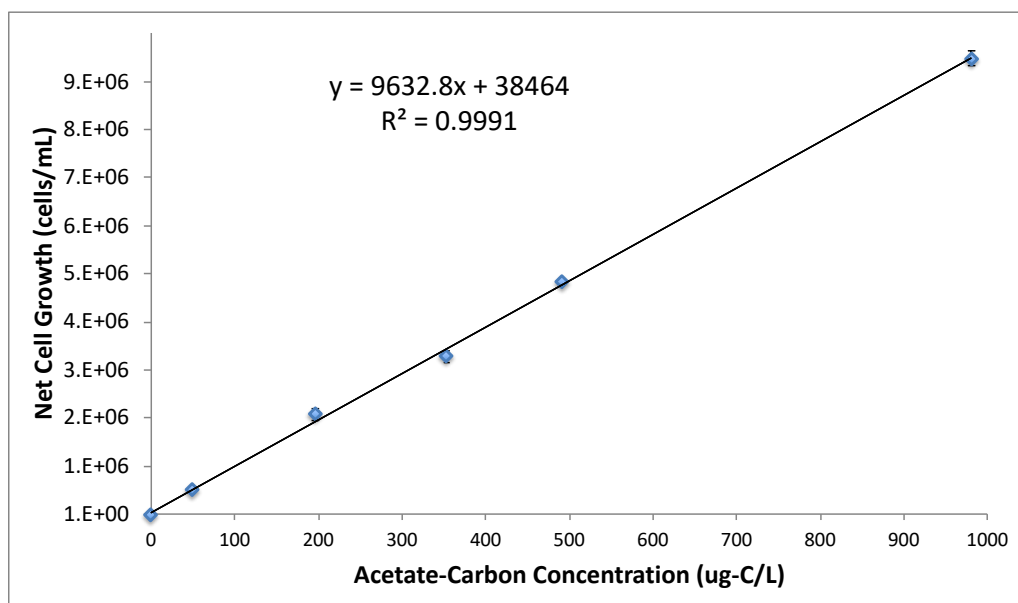

177  
 178 **Figure S3: Assimilable organic carbon calibration curve based on net growth of total flow**  
 179 **cytometric cell counts on known concentrations of acetate-carbon.** Samples were performed  
 180 in triplicate. Standard deviation of each sample is shown by vertical bars.

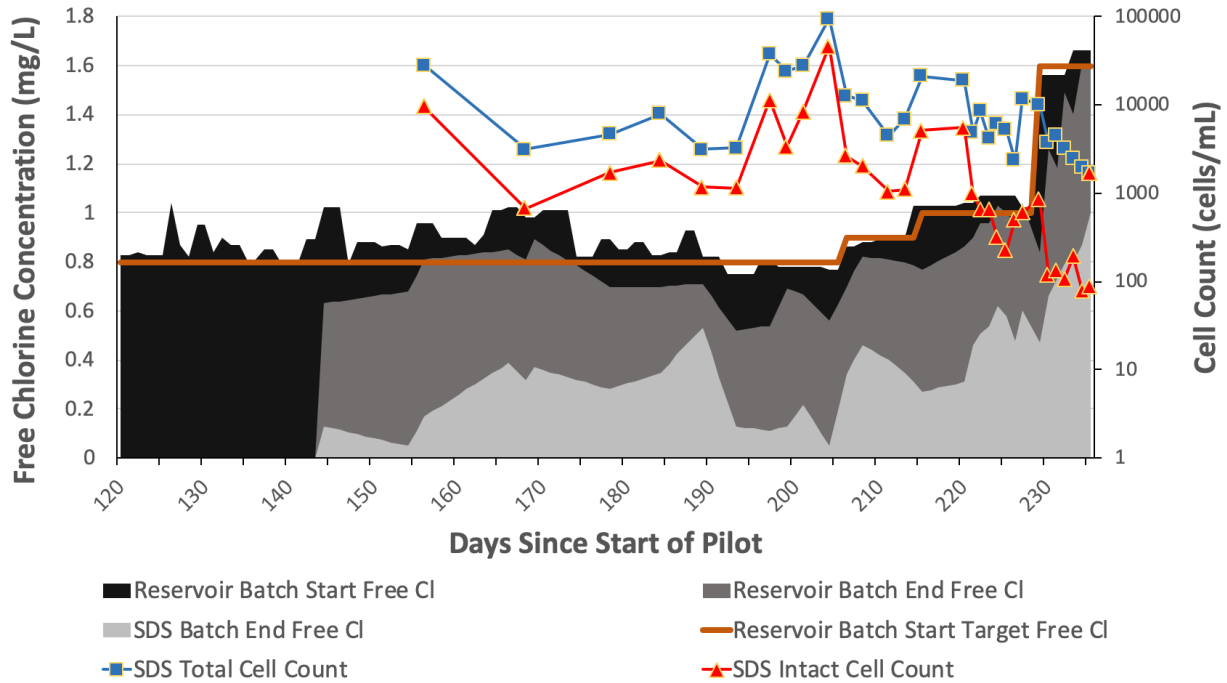

181  
 182 **Figure S4: Time series of the reservoir and SDS free chlorine concentrations, and SDS total**  
 183 **and intact cell counts.** All free chlorine and cell count data represent averages of the three  
 184 simulated distribution systems for that day. Cell count measurements were conducted in technical  
 185 triplicate.  
 186

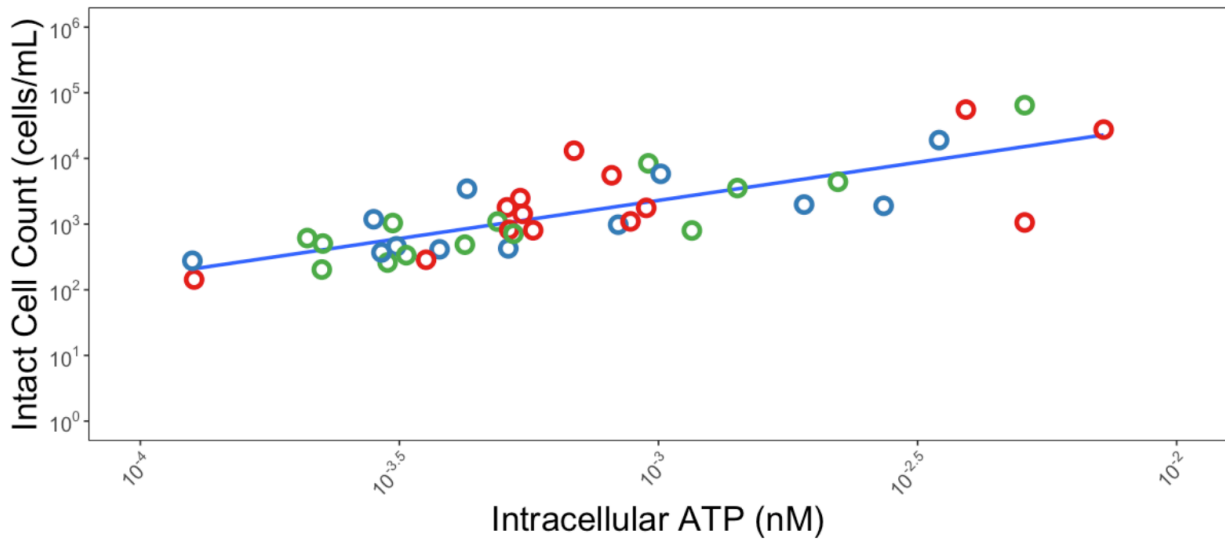

187 Sampling Location ⊖ SDS 1 ⊖ SDS 2 ⊖ SDS 3  
 188 **Figure S5: Relationship of intact cell counts and intracellular ATP in the SDS.** A linear  
 189 correlation was found ( $R^2 = 0.47$ ;  $p < 0.001$ ;  $n = 43$ ), and an average ATP-per-cell value of  $6.87 \pm$   
 190  $7.72 \times 10^{-10}$  nmol/cell was calculated from the dataset. All measurements were conducted in  
 191 technical triplicate.

192 **4. References**

193 Gatza, E., Hammes, F., & Prest, E. (2013). *Assessing Water Quality with the BD Accuri™ C6*  
194 *Flow Cytometer* (pp. 1–12).

195 Hammes, F. (2015, February 18). Assimilable Organic Carbon (AOC): Filtration Method.  
196 Zurich, Switzerland.
